# Supplementary material for: Microinfarcts are Associated with Cognitive Impairment in Neurofibrillary Tangle Predominant Decedents: Evidence from the NACC Autopsy Cohort
Source: Research Square preprint supplement (doi:10.21203/rs.3.rs-7036276/v1), 2025-07-14
Supplement: Supplementary file 1 [file de416213f58086a213289e0a.docx]

# **Supplemental Tables**

| Supplemental Table 1: Primary etiologic diagnoses in amyloid-negative, tau-positive decedents (N = 579) | |
| --- | --- |
| Etiologic Diagnosis | n (%) |
| Alzheimer’s disease (AD) | 226 (39.0) |
| Lewy body disease (LBD) | 78 (13.5) |
| Progressive supranuclear palsy (PSP) | 1 (0.2) |
| Corticobasal degeneration (CBD) | 2 (0.3) |
| Frontotemporal lobar degeneration, other (FTLD-other) | 2 (0.3) |
| Vascular brain injury or vascular dementia (including stroke) | 35 (6.0) |
| Traumatic brain injury (TBI) | 1 (0.2) |
| Normal-pressure hydrocephalus (NPH) | 2 (0.3) |
| Other neurologic, genetic, or infectious condition | 4 (0.7) |
| Depression | 1 (0.2) |
| Schizophrenia or other psychosis | 1 (0.2) |
| Cognitive impairment due to alcohol abuse | 2 (0.3) |
| Cognitive impairment due to other substance abuse | 1 (0.2) |
| Cognitive impairment due to systemic disease or medical illness | 7 (1.2) |
| Cognitive impairment for other specified reasons (e.g., written-in diagnoses) | 10 (1.7) |
| Not cognitively impaired | 185 (32.0) |
| Missing or unknown | 21 (3.6) |
| Diagnoses reflect the most recent adjudicated primary etiologic diagnosis recorded in NACCETPR variable. Participants classified as “Not cognitively impaired” were judged to have normal cognition; "Missing or unknown" indicates no recorded diagnosis. | |

| Supplementary Table 2: Association between vascular neuropathologies and cross-sectional cognitive domain and dementia scores proximal to death controlling for harmonized cardiovascular disease risk | | | | | | | | |
| --- | --- | --- | --- | --- | --- | --- | --- | --- |
|  | *Memory* | | *Executive Function* | | *Language* | | *CDR Sum of Boxes* | |
| *Predictor* | *β (95% CI)* | *p* | *β (95% CI)* | *p* | *β (95% CI)* | *p* | *β (95% CI)* | *p* |
| Arteriolosclerosis | -0.12 (-0.34 – 0.10) | 0.27 | -0.11 (-0.29 – 0.08) | 0.26 | **-0.17 (-0.32 – -0.01)** | **0.03** | 0.04 (-0.92 – 1.00) | 0.94 |
| Atherosclerosis | -0.07 (-0.30 – 0.17) | 0.57 | -0.03 (-0.22 – 0.16) | 0.73 | 0.09 (-0.08 – 0.26) | 0.30 | -0.05 (-1.08 – 0.97) | 0.92 |
| CAA | -0.15 (-0.44 – 0.14) | 0.30 | -0.05 (-0.29 – 0.19) | 0.69 | -0.01 (-0.22 – 0.20) | 0.91 | 0.79 (-0.45 – 2.03) | 0.21 |
| Gross Infarcts | -0.18 (-0.46 – 0.10) | 0.21 | -0.10 (-0.33 – 0.13) | 0.40 | -0.18 (-0.39 – 0.02) | 0.08 | 1.58 (0.37 – 2.79) | 0.01 |
| Microinfarcts | **-0.25 (-0.49 – -0.01)** | **0.04** | **-0.25 (-0.45 – -0.04)** | **0.02** | **-0.21 (-0.39 – -0.04)** | **0.02** | 0.64 (-0.45 – 1.72) | 0.25 |
| This table presents the results of linear regression analyses assessing the associations between vascular neuropathologies and cognitive domain scores (memory, executive function, and language), as well as global dementia severity measured by the Clinical Dementia Rating (CDR) Sum of Boxes, controlling for harmonized cardiovascular disease risk. Beta coefficients (β) with 95% confidence intervals (CI) and corresponding p-values are reported for each vascular pathology, including arteriolosclerosis, atherosclerosis, cerebral amyloid angiopathy (CAA), gross infarcts, and microinfarcts. Negative β values indicate worse cognitive performance associated with the presence of the pathology, while positive β values for the CDR Sum of Boxes reflect greater dementia severity. Statistical significance was defined as p < 0.05. | | | | | | | | |

| Supplementary Table 3:Association between vascular neuropathologies and cross-sectional cognitive domain scores & dementia approximate to death in those without low neuritic plaques | | | | | | | | |
| --- | --- | --- | --- | --- | --- | --- | --- | --- |
|  | *Memory* | | *Executive Function* | | *Language* | | *CDR Sum of Boxes* | |
| *Predictor* | *β (95% CI)* | *p* | *β (95% CI)* | *p* | *β (95% CI)* | *p* | *β (95% CI)* | *p* |
| Arteriolosclerosis | -0.12 (-0.42 – 0.17) | 0.41 | -0.19 (-0.48 – 0.09) | 0.19 | -0.05 (-0.29 – 0.19) | 0.67 | 0.53 (-0.77 – 1.82) | 0.42 |
| Atherosclerosis | -0.19 (-0.49 – 0.11) | 0.22 | -0.17 (-0.46 – 0.12) | 0.24 | 0.12 (-0.12 – 0.36) | 0.32 | -0.28 (-1.60 – 1.04) | 0.67 |
| CAA | -0.22 (-0.74 – 0.30) | 0.40 | -0.16 (-0.64 – 0.32) | 0.51 | 0.27 (-0.16 – 0.71) | 0.22 | 0.27 (-1.96 – 2.49) | 0.81 |
| Gross Infarcts | **-0.38 (-0.75 – -0.01)** | **0.04** | -0.17 (-0.57 – 0.23) | 0.41 | -0.28 (-0.58 – 0.02) | 0.07 | **2.90 (1.29 – 4.51)** | **<0.01** |
| Microinfarcts | **-0.41 (-0.72 – -0.11)** | **0.01** | **-0.48 (-0.77 – -0.19)** | **<0.01** | **-0.27 (-0.51 – -0.02)** | **0.03** | **1.46 (0.13 – 2.80)** | **0.03** |
| This table presents the results of linear regression analyses examining the associations between vascular neuropathologies and cognitive domain scores (memory, executive function, and language), as well as dementia severity measured by the Clinical Dementia Rating (CDR) Sum of Boxes, after excluding individuals with low neuritic amyloid pathology. Beta coefficients (β) with 95% confidence intervals (CI) and corresponding p-values are reported for arteriolosclerosis, atherosclerosis, cerebral amyloid angiopathy (CAA), gross infarcts, and microinfarcts. Negative β values indicate poorer cognitive performance associated with the presence of the pathology, while positive β values for the CDR Sum of Boxes indicate greater dementia severity. Statistical significance was defined as p < 0.05. | | | | | | | | |

| Supplementary Table 4:Association between vascular neuropathologies and cross-sectional cognitive domain scores & dementia adjusting for neuritic plaques and Braak stage | | | | | | | | |
| --- | --- | --- | --- | --- | --- | --- | --- | --- |
|  | *Memory* | | *Executive Function* | | *Language* | | *CDR Sum of Boxes* | |
| *Predictor* | *β (95% CI)* | *p* | *β (95% CI)* | *p* | *β (95% CI)* | *p* | *β (95% CI)* | *p* |
| Arteriolosclerosis | -0.10 (-0.30 – 0.11) | 0.36 | -0.10 (-0.28 – 0.08) | 0.29 | -0.13 (-0.28 – 0.02) | 0.09 | 0.03 (-0.89 – 0.96) | 0.95 |
| Atherosclerosis | -0.10 (-0.31 – 0.11) | 0.34 | -0.04 (-0.22 – 0.15) | 0.70 | 0.07 (-0.09 – 0.22) | 0.41 | -0.01 (-0.94 – 0.93) | 0.99 |
| CAA | -0.06 (-0.32 – 0.21) | 0.67 | -0.00 (-0.24 – 0.24) | 0.99 | 0.10 (-0.10 – 0.31) | 0.32 | 0.63 (-0.54 – 1.80) | 0.29 |
| Gross Infarcts | **-0.25 (-0.50 – -0.01)** | **0.04** | -0.07 (-0.30 – 0.15) | 0.52 | -0.18 (-0.37 – 0.01) | 0.06 | **1.69 (0.59 – 2.78)** | **<0.01** |
| Microinfarcts | **-0.27 (-0.48 – -0.05)** | **0.02** | **-0.25 (-0.44 – -0.05)** | **0.01** | **-0.22 (-0.38 – -0.05)** | **0.01** | **1.04 (0.05 – 2.03)** | **0.04** |
| This table presents the results of linear regression analyses examining the associations between vascular neuropathologies and cognitive domain scores (memory, executive function, and language) as well as dementia severity measured by the Clinical Dementia Rating (CDR) Sum of Boxes controlling for neuritic plaques and Braak stage. Beta coefficients (β) with 95% confidence intervals (CI) and corresponding p-values are reported for arteriolosclerosis, atherosclerosis, cerebral amyloid angiopathy (CAA), gross infarcts, and microinfarcts. Negative β values indicate poorer cognitive performance associated with the presence of the pathology, while positive β values for the CDR Sum of Boxes indicate greater dementia severity. Statistical significance was defined as p < 0.05. | | | | | | | | |

| Supplemental Table 5. Interaction effects of neuritic plaques and Braak stage on cognitive decline in the years prior to death | | | | | | | | | |
| --- | --- | --- | --- | --- | --- | --- | --- | --- | --- |
|  |  | *Memory* | | *Executive Function* | | *Language* | | *CDR Sum of Boxes* | |
| *Model* | *Predictors* | *β (95% CI)* | *p* | *β (95% CI)* | *p* | *β (95% CI)* | *p* | *β (95% CI)* | *p* |
| Model 1 | years to death × neuritic plaques (C1) | **-0.05 (-0.08 – -0.03)** | **<0.01** | -0.01 (-0.03 – 0.00) | 0.13 | **-0.04 (-0.06 – -0.03)** | **<0.01** | **0.40 (0.25 – 0.56)** | **<0.01** |
| Model 2 | years to death × Braak (B3) | **-0.12 (-0.16 – -0.09)** | **<0.01** | -0.03 (-0.06 – 0.00) | 0.08 | **-0.08 (-0.11 – -0.06)** | **<0.01** | **0.86 (0.66 – 1.06)** | **<0.01** |
| Model 3 | years to death × neuritic plaques (C1) | **-0.03 (-0.05 – -0.01)** | **0.01** | -0.01 (-0.03 – 0.01) | 0.32 | **-0.03 (-0.05 – -0.01)** | **<0.01** | **0.20 (0.04 – 0.36)** | **0.01** |
|  | years to death × Braak (B3) | **-0.11 (-0.14 – -0.08)** | **<0.01** | -0.02 (-0.05 – 0.01) | 0.17 | **-0.07 (-0.09 – -0.04)** | **<0.01** | **0.77 (0.56 – 0.98)** | **<0.01** |
| Linear mixed-effects models were used to examine the interaction between time to death and neuropathological markers on longitudinal cognitive outcomes across four cognitive domains and global cognition (CDR Sum of Boxes). Model 1 includes the interaction term between years to death and neuritic plaque burden. Model 2 includes the interaction between years to death and Braak stage. Model 3 includes both interaction terms simultaneously. Estimates (β) reflect the slope difference in cognitive change over time associated with each pathology group. Statistically significant effects (p < 0.05) are bolded. Confidence intervals (CI) are shown in parentheses. | | | | | | | | | |
